# Supplementary material
Source: HighWire-hosted journal article supplement (https://bmjopen.bmj.com/content/12/6/e060058)
Supplement: inline-supplementary-material-1 [file inline-supplementary-material-1.pdf]

PATIENT-REPORTED EXPERIENCE  
MEASURE – FINAL VISIT

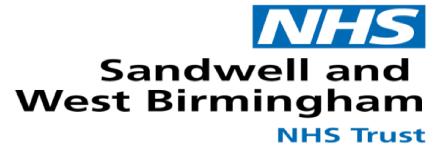

### **SECTION 1: About the questionnaires used in the trial**

(1) Were the questionnaires easy to follow and complete?

Yes  No  Not sure

Please explain your answer:

(2) Do you feel the number of questionnaires you had to fill in was appropriate?

Yes  No  Not sure

Please explain your answer:

(3) Did the questionnaires cover the most important aspects of your condition?

Yes  No  Not sure

Please explain your answer:

### **SECTION 2: About the assessment of cognitive levels**

(1) The Stroop Test was a Mobile App used to assess your cognition in 60 seconds. Did you understand what was being asked of you?

Yes  No

Please explain your answer:

(2) Did you find this Mobile App easy to use?

Yes  No

Please explain your answer:

Participant-reported experience measure

Short title: Whole Body Photobiomodulation and Fibromyalgia Trial

IRAS number: 278452

R&D Ref: 20PAIN01

Page 1 of 4

PATIENT-REPORTED EXPERIENCE  
MEASURE – FINAL VISIT

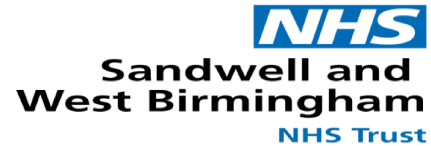

(3) Would you be happy to complete additional tests such as this in a future trial?

Yes  No  Not sure

Please explain your answer:

**SECTION 3: About the tender point examination**

(1) I think the tender point exam was necessary towards assessing my condition

Yes  No

Please explain your answer:

(2) I would be happy to have my tender point count assessed in future trials

Yes  No

Please explain your answer:

**SECTION 4: About your experience of the treatment**

(1) Please list 3 words that you would associate with your experience of using the NovoTHOR®

- i. \_\_\_\_\_
- ii. \_\_\_\_\_
- iii. \_\_\_\_\_

Further comments:

PATIENT-REPORTED EXPERIENCE  
MEASURE – FINAL VISIT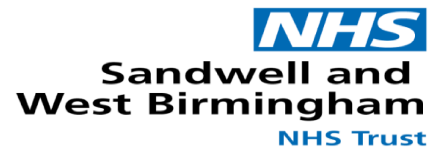

(2) Would you like the number and frequency of treatment sessions to change?

Yes

No

Not sure

Please explain your answer:

(3) Do you think it would have been helpful to have received access to a video demonstration prior to visiting the hospital?

Please explain your answer:

*The following questions require a response from 1 – 5:*

1 = strongly disagree   2 = disagree   3 = neutral   4 = agree   5 = strongly agree

(4) I found the NovoTHOR was comfortable to use

1

2

3

4

5

Comments:

(5) I found the NovoTHOR was easy to operate

1

2

3

4

5

Comments:

(6) I was comfortable being in my underwear for the treatment

1

2

3

4

5

Comments:

Participant-reported experience measure

Short title: Whole Body Photobiomodulation and Fibromyalgia Trial

IRAS number: 278452

R&D Ref: 20PAIN01

Page 3 of 4

PATIENT-REPORTED EXPERIENCE  
MEASURE – FINAL VISIT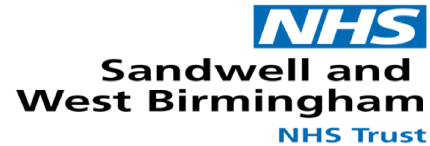

(7) I felt claustrophobic during the treatment sessions

1  2  3  4  5

Comments:

**SECTION 5: About your experience of the trial**

(1) Please give any comments you have around access and accessibility of treatment.

Comments:

(2) I would be happy to take part in fibromyalgia research in the future.

Yes  No

Please explain your answer:

(3) I found the audio-recorded interviews straight-forward and was made to feel comfortable during the interview.

Yes  No  N/A

Please explain your answer:

(4) If I was involved in an interview in a future trial I would be happy to take the process further and perform a think aloud task with the guidance of an interviewer.

Yes  No  Maybe

Please explain your answer:
